# Supplementary material
Source: Royal Society of Chemistry journal article supplement (https://www.rsc.org/suppdata/cp/1999/3387/pdf1.pdf)
Supplement: Supplementary file 1 [file pdf1.pdf]

TABLES

TABLE I. Rovibrational energies (in  $\text{cm}^{-1}$ ) for the  $K=0$  states of symmetry  $A_1^+$

| J=0      | J=1      | J=2      | J=3      | J=4      | J=5      | J=6      | $B_p = \frac{B+C}{2}$ |
|----------|----------|----------|----------|----------|----------|----------|-----------------------|
| -73.1786 |          | -72.6645 |          | -71.4657 |          | -69.5847 | 0.0856                |
| -49.5922 |          | -49.1315 |          | -48.0581 |          | -46.3753 | 0.0767                |
| -44.2714 |          | -43.7664 |          | -42.5889 |          | -40.7406 | 0.0841                |
| -32.4022 |          | -31.9876 |          | -31.0209 |          | -29.5042 | 0.0691                |
| -30.8921 |          | -30.5278 |          | -29.6792 |          | -28.3496 | 0.0606                |
| -23.6636 |          | -23.2670 |          | -22.3425 |          | -20.8921 | 0.0661                |
| -20.5172 |          | -20.1149 |          | -19.2000 |          | -17.7912 |                       |
| -20.2413 |          | -19.8080 |          | -18.7747 |          | -17.1272 |                       |
| -15.8469 |          | -15.4410 |          | -14.4940 |          | -13.0059 | 0.0676                |
| -11.1087 |          | -10.7146 |          | -9.7962  |          | -8.3566  | 0.0656                |
| -9.3041  |          | -8.9251  |          | -8.0416  |          | -6.6555  | 0.0631                |
| -6.7030  |          | -6.3208  |          | -5.4285  |          | -4.0259  | 0.0637                |
| -3.4818  |          | -3.1058  |          | -2.2288  |          | -0.8515  | 0.0626                |
| -1.3391  |          | -0.9861  |          | -0.1630  |          |          | 0.0588                |
| -0.7512  |          | -0.3336  |          |          |          |          | 0.0696                |
|          | -27.5267 |          | -26.8651 |          | -25.6790 |          | 0.0660                |
|          | -11.4386 |          | -10.7839 |          | -9.6065  |          | 0.0654                |

TABLE II. Rovibrational energies (in  $\text{cm}^{-1}$ ) for the  $K=0$  states of symmetry  $B_1^-$

| J=0      | J=1      | J=2      | J=3      | J=4      | J=5      | J=6      | $B_p = \frac{B+C}{2}$ |
|----------|----------|----------|----------|----------|----------|----------|-----------------------|
| -66.2618 |          | -65.7592 |          | -64.5876 |          | -62.7494 | 0.0837                |
| -45.7900 |          | -45.3084 |          | -44.1887 |          | -42.4406 | 0.0799                |
| -43.1215 |          | -42.6502 |          | -41.5489 |          | -39.8133 | 0.0787                |
| -28.7973 |          | -28.3866 |          | -27.4292 |          | -25.9265 | 0.0684                |
| -20.9393 |          | -20.5298 |          | -19.5822 |          | -18.1108 |                       |
| -20.1456 |          | -19.7066 |          | -18.6762 |          | -17.0454 | 0.0736                |
| -12.6254 |          | -12.2220 |          | -11.2814 |          | -9.8045  | 0.0672                |
| -10.8319 |          | -10.4350 |          | -9.5101  |          | -8.0597  | 0.0661                |
| -4.2495  |          | -3.8537  |          | -2.9306  |          | -1.4814  | 0.059                 |
| -2.3457  |          | -1.9677  |          | -1.0860  |          |          | 0.0630                |
| -0.451   |          | -0.2289  |          |          |          |          | 0.0693                |
|          | -29.3307 |          | -28.6616 |          | -27.4590 |          | 0.0679                |
|          | -16.1425 |          | -15.5675 |          | -14.5331 |          | 0.0575                |
|          | -13.4644 |          | -12.8052 |          | -11.6196 |          | 0.0659                |

TABLE III. Rovibrational energies (in  $\text{cm}^{-1}$ ) for the  $K=1$  states of symmetry  $A_1^+$

| J=1      | J=2      | J=3      | J=4      | J=5      | J=6      | $B_p = \frac{B+C}{2}$ |
|----------|----------|----------|----------|----------|----------|-----------------------|
| -46.9603 | -46.6602 | -46.2105 | -45.6115 | -44.8638 | -43.9683 | 0.0749                |
| -36.8082 | -36.5233 | -36.0963 | -35.5279 | -34.8186 | -33.9695 | 0.0711                |
| -33.3797 | -33.1043 | -32.6910 | -32.1400 | -31.4510 | -30.6241 | 0.0689                |
| -24.4088 | -24.1206 | -23.6891 | -23.1158 | -22.4021 | -21.5503 |                       |
| -23.2733 | -22.9936 | -22.5735 | -22.0127 | -21.3102 | -20.4651 | 0.0701                |
| -19.8970 | -19.6412 | -19.2576 | -18.7465 | -18.1083 | -17.3432 | 0.0639                |
| -17.7080 | -17.4460 | -17.0529 | -16.5286 | -15.8731 | -15.0861 | 0.0655                |
| -12.1859 | -11.9456 | -11.5852 | -11.1049 | -10.5047 | -9.7849  | 0.0601                |
| -7.7138  | -7.4456  | -7.0438  | -6.5087  | -5.8409  | -5.0413  | 0.0669                |
| -6.515   | -6.2496  | -5.8516  | -5.3214  | -4.6591  | -3.8653  | 0.0663                |
| -5.3258  | -5.0676  | -4.6804  | -4.1640  | -3.5183  | -2.7431  | 0.0645                |
| -3.6453  | -3.3977  | -3.0265  | -2.5317  | -1.9134  | -1.1717  | 0.0619                |
| -2.1251  | -1.8259  | -1.3783  | -0.7836  | -0.4455  |          |                       |
| -1.1347  | -0.8653  | -0.4603  |          |          |          |                       |

TABLE IV. Rovibrational energies (in  $\text{cm}^{-1}$ ) for the  $K=1$  states of symmetry  $B_1^-$

| J=1      | J=2      | J=3      | J=4      | J=5      | J=6      | $B_p = \frac{B+C}{2}$ |
|----------|----------|----------|----------|----------|----------|-----------------------|
| -44.0461 | -43.7598 | -43.3309 | -42.7597 | -42.0468 | -41.1931 | 0.0714                |
| -36.6882 | -36.3882 | -35.9385 | -35.3394 | -34.5914 | -33.6951 | 0.0749                |
| -33.1878 | -32.9234 | -32.5268 | -31.9982 | -31.3375 | -30.5450 | 0.0661                |
| -24.0696 | -23.7711 | -23.3237 | -22.7276 | -21.9833 | -21.0914 | 0.0745                |
| -21.8501 | -21.5959 | -21.2149 | -20.7076 | -20.0745 | -19.3162 | 0.0635                |
| -20.0351 | -19.7626 | -19.3540 | -18.8095 | -18.1296 | -17.3148 | 0.0681                |
| -18.4476 | -18.1889 | -17.8007 | -17.2828 | -16.6351 | -15.8573 | 0.0647                |
| -11.3026 | -11.0653 | -10.7093 | -10.2348 | -9.6416  | -8.9299  | 0.0593                |
| -7.1534  | -6.8805  | -6.4725  | -5.9323  | -5.2654  | -4.4802  |                       |
| -6.9115  | -6.6565  | -6.2730  | -5.7588  | -5.1088  | -4.3155  |                       |
| -4.7555  | -4.5061  | -4.1322  | -3.6338  | -3.0110  | -2.2640  | 0.0623                |
| -4.0619  | -3.8002  | -3.4078  | -2.8847  | -2.2312  | -1.4475  | 0.0654                |
| -2.1583  | -1.8731  | -1.4489  | -0.8898  | -0.2003  |          |                       |
| -1.6794  | -1.3968  | -0.9694  | -0.3935  |          |          |                       |

TABLE V. Rovibrational energies (in  $\text{cm}^{-1}$ ) for the  $K=2$  states of symmetry  $A_1^+$

| J=2      | J=3      | J=4      | J=5      | J=6      | $B_p = \frac{B+C}{2}$ |
|----------|----------|----------|----------|----------|-----------------------|
| -70.8441 | -70.3318 | -69.6491 | -68.7964 | -67.7741 | 0.0853                |
| -55.7028 | -55.2007 | -54.5317 | -53.6960 | -52.6942 | 0.0836                |
| -47.0820 | -46.6259 | -46.0184 | -45.2598 | -44.3507 | 0.0759                |
| -33.8266 | -33.3847 | -32.7962 | -32.0616 | -31.1816 | 0.0735                |
| -29.5727 | -29.1515 | -28.5900 | -27.8883 | -27.0467 | 0.0702                |
| -22.8463 | -22.4465 | -21.9140 | -21.2493 | -20.4530 | 0.0665                |
| -20.6375 | -20.2494 | -19.7354 | -19.0960 | -18.3314 |                       |
| -20.2240 | -19.7226 | -19.0518 | -18.2120 | -17.2043 | 0.0837                |
| -17.0345 | -16.6243 | -16.0774 | -15.3937 | -14.5730 | 0.0684                |
| -13.7615 | -13.3569 | -12.8176 | -12.1438 | -11.3357 | 0.0674                |
| -11.3718 | -10.9734 | -10.4430 | -9.7813  | -8.9891  | 0.0663                |
| -10.8158 | -10.4271 | -9.9085  | -9.2599  | -8.4809  | 0.0648                |
| -5.8719  | -5.4795  | -4.9563  | -4.3024  | -3.5178  | 0.0654                |
| -3.5559  | -3.1532  | -2.6172  | -1.9486  | -1.1483  | 0.0670                |
| -2.5525  | -2.1693  | -1.6581  | -1.0185  | -0.2500  | 0.0639                |
| -0.1593  |          |          |          |          |                       |

TABLE VI. Rovibrational energies (in  $\text{cm}^{-1}$ ) for the  $K=2$  states of symmetry  $B_1^-$

| J=2      | J=3      | J=4      | J=5      | J=6      | $B_p = \frac{B+C}{2}$ |
|----------|----------|----------|----------|----------|-----------------------|
| -57.0889 | -56.5801 | -55.9022 | -55.0553 | -54.0400 | 0.0847                |
| -33.6218 | -33.1661 | -32.5590 | -31.8009 | -30.8924 | 0.0759                |
| -28.4848 | -28.0851 | -27.5525 | -26.8873 | -26.0902 | 0.0666                |
| -20.2234 | -19.7177 | -19.0452 | -18.2416 | -17.4731 |                       |
| -19.7218 | -19.3446 | -18.8409 | -18.1762 | -17.1854 |                       |
| -16.5982 | -16.1846 | -15.6332 | -14.9441 | -14.1173 | 0.0689                |
| -12.8905 | -12.4919 | -11.9609 | -11.2976 | -10.5025 | 0.0664                |
| -11.3680 | -10.9667 | -10.4320 | -9.7641  | -8.9634  | 0.0669                |
| -9.1873  | -8.8067  | -8.2993  | -7.6653  | -6.9048  | 0.0634                |
| -3.5990  | -3.1898  | -2.6445  | -1.9634  | -1.1470  | 0.0682                |
